# Supplementary material for: Distinct Patterns of Gene Gain and Loss: Diverse Evolutionary Modes of NBS-Encoding Genes in Three Solanaceae Crop Species
Source: PubMed Central journal article supplement (PMC5427506; doi:10.1534/g3.117.040485), 2017-03-28

**A**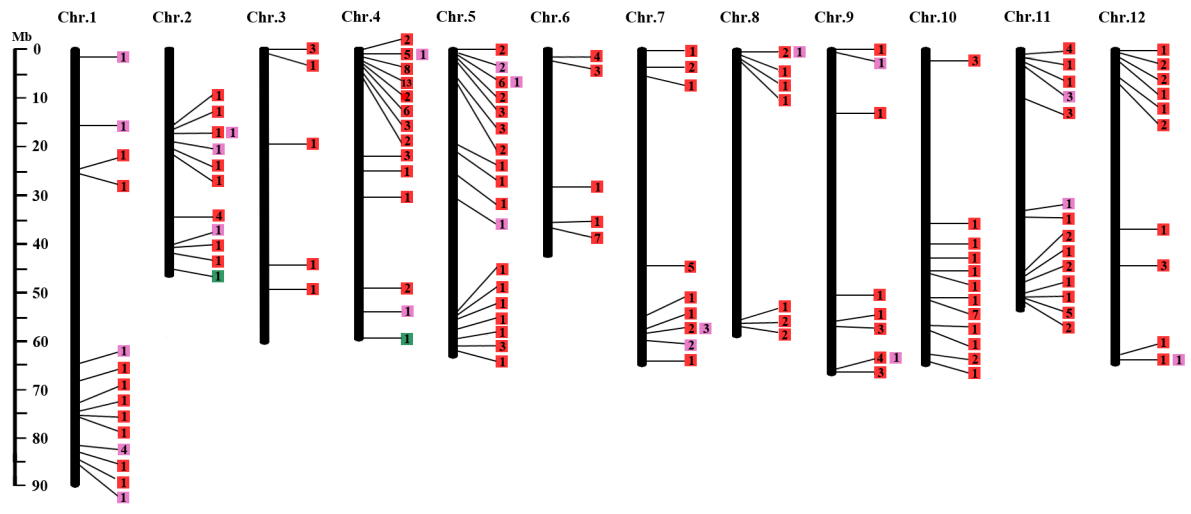**B**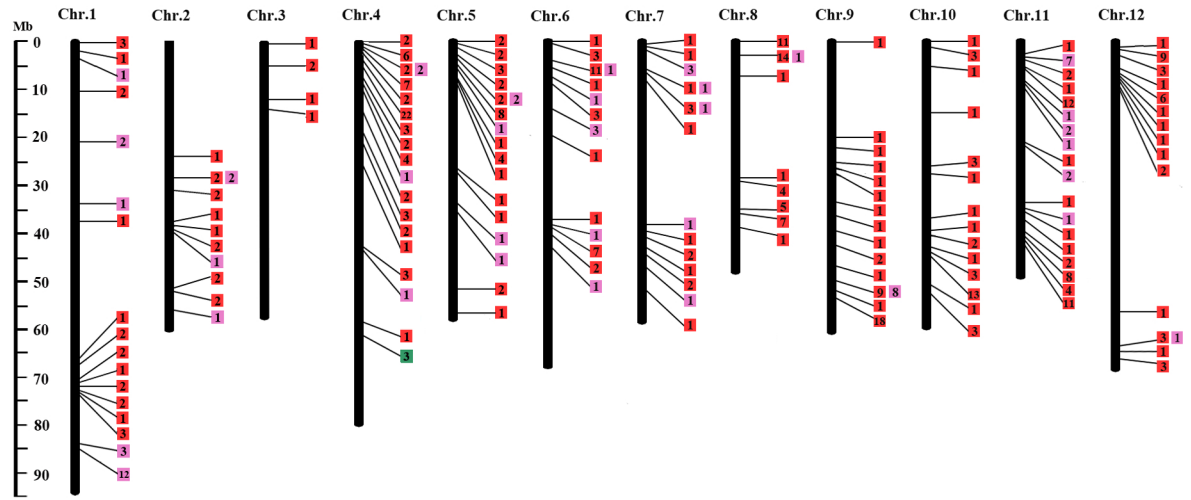**C**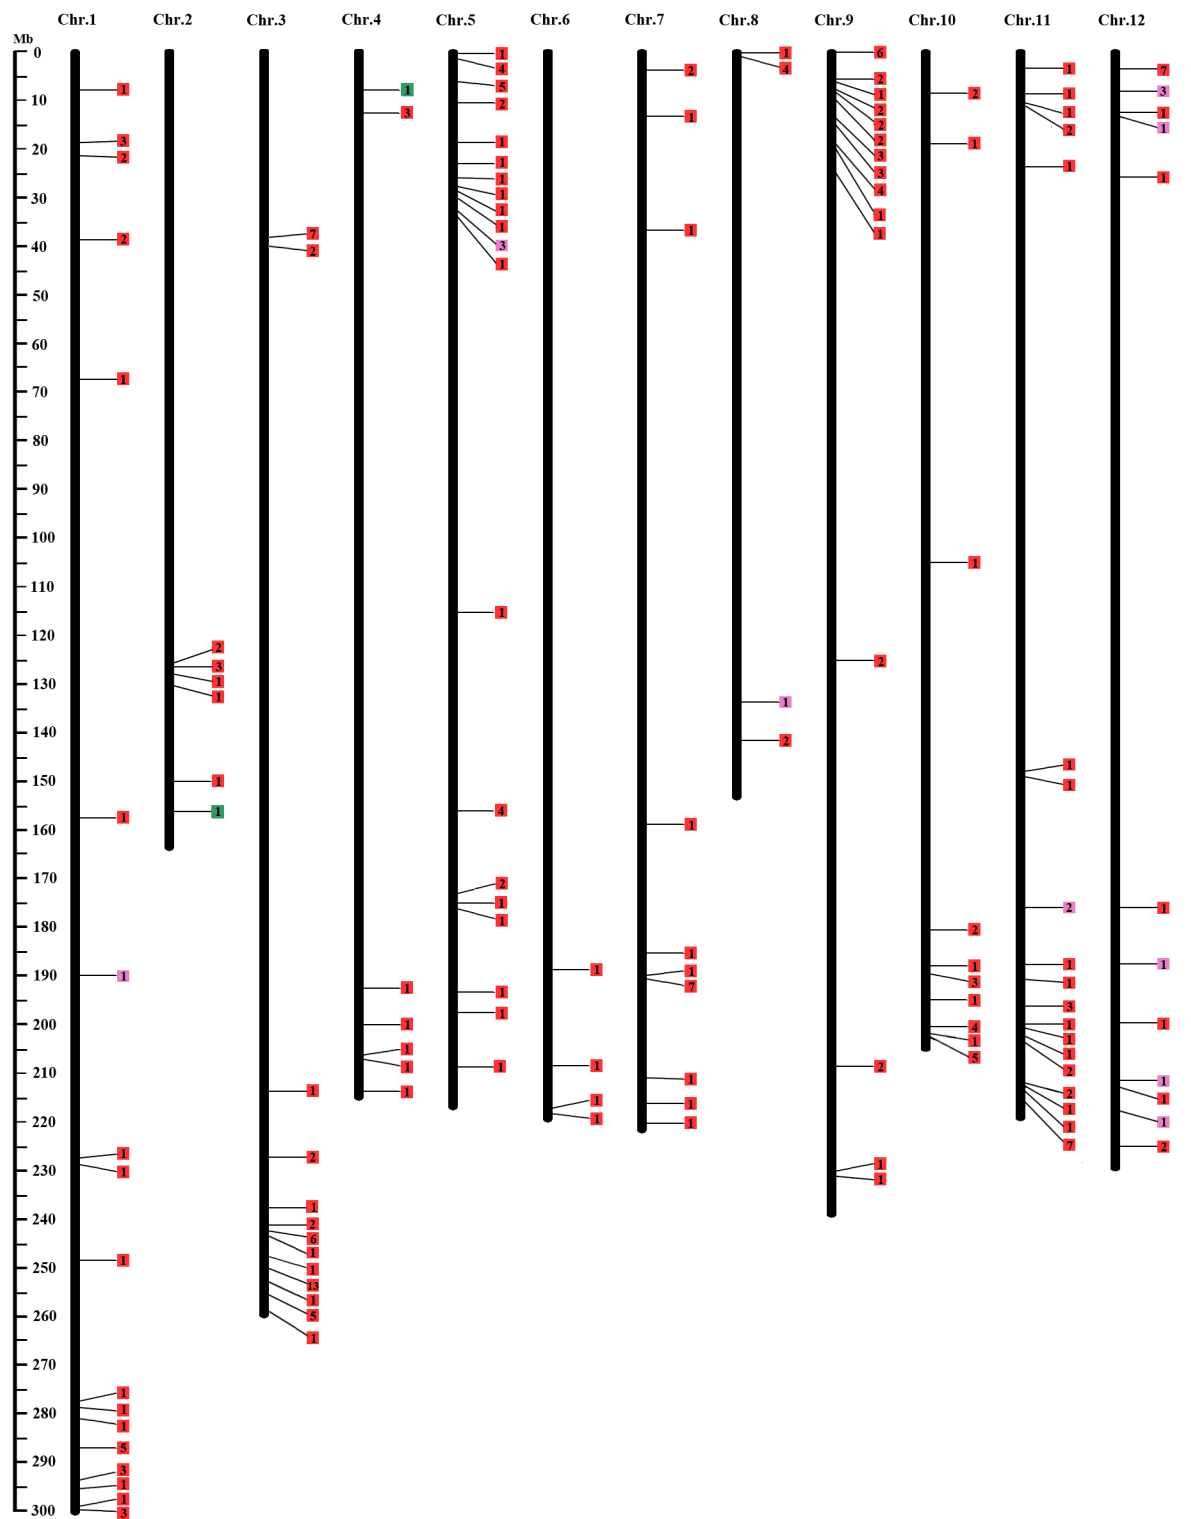

Supplement: 1577FigureS1.pdf [file 1577FigureS1.pdf]
